# Supplementary material for: K–8 Classroom Self-Collection Using XpressCollect Nasal Swab: A Usability and Efficacy Study
Source: MDPI journal article supplement (doi:10.3390/diagnostics12051245), 2022-05-17
Supplement: s1 [file s1]

1

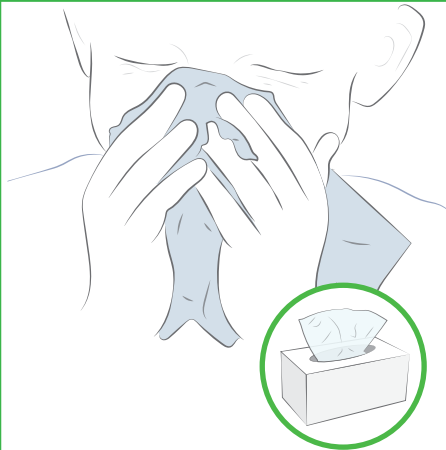

**BLOW NOSE**

2

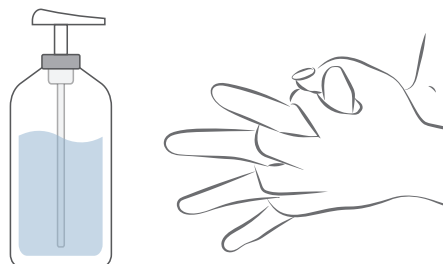

**SANITIZE HANDS**

3

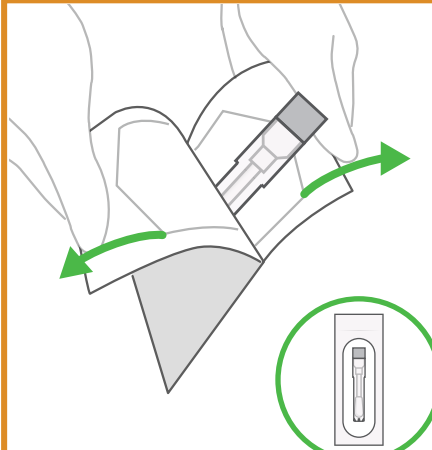

**OPEN PACKAGE**

4

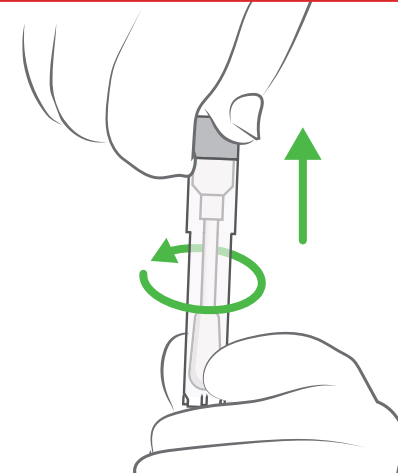

**TWIST AND PULL**

5

**4 BIG CIRCLES  
INSIDE OF NOSE**

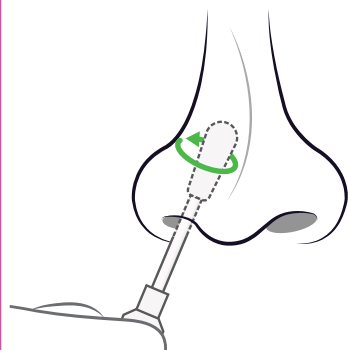

**LEFT SIDE**

6

**4 BIG CIRCLES  
INSIDE OF NOSE**

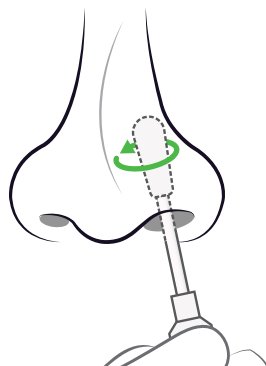

**RIGHT SIDE**

7

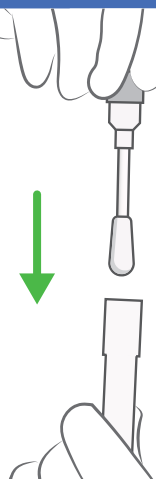

**SWAB IN TUBE**

8

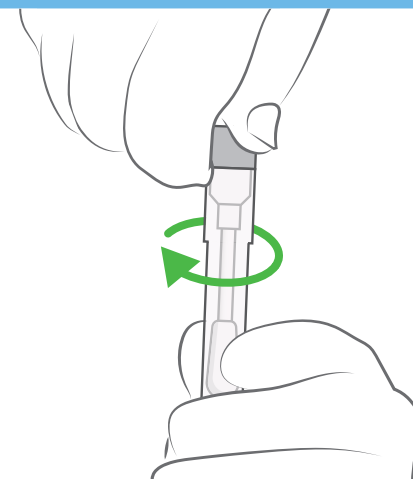

**TWIST TIGHT**
