# Supplementary material for: K–8 Classroom Self-Collection Using XpressCollect Nasal Swab: A Usability and Efficacy Study
Source: MDPI journal article supplement (doi:10.3390/diagnostics12051245), 2022-05-17
Supplement: s1 [file s1]

1

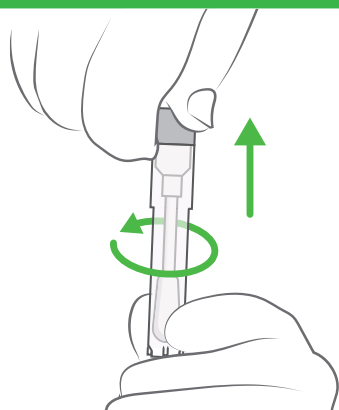

**TWIST AND  
PULL**

2

4 BIG CIRCLES  
INSIDE OF NOSE

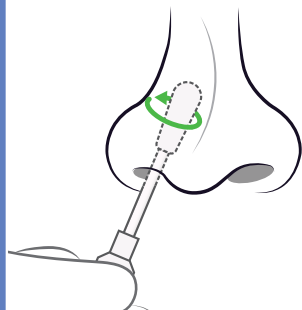

**LEFT  
SIDE**

3

4 BIG CIRCLES  
INSIDE OF NOSE

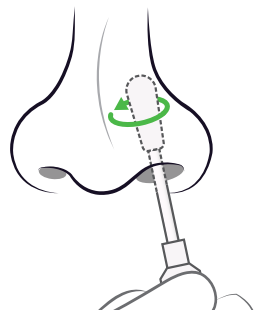

**RIGHT  
SIDE**

4

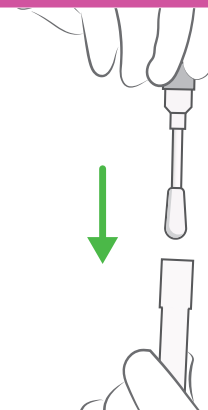

**SWAB IN  
TUBE**

5

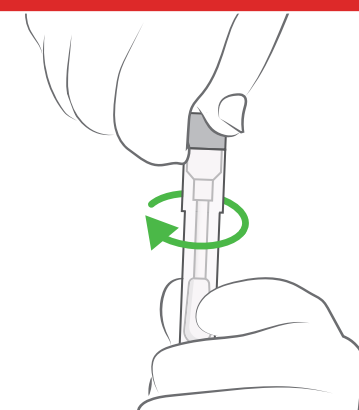

**TWIST  
TIGHT**
